# Supplementary material for: Overexpression of EZH2 in conjunctival melanoma offers a new therapeutic target
Source: PubMed Central journal article supplement — J Pathol. 2018 Jun 23;245(4):433–44. doi: 10.1002/path.5094 (PMC6174981; doi:10.1002/path.5094), 2018-06-23
Supplement: PATH-245-433-s003.pdf [file PATH-245-433-s003.pdf]

## Supplementary Figures

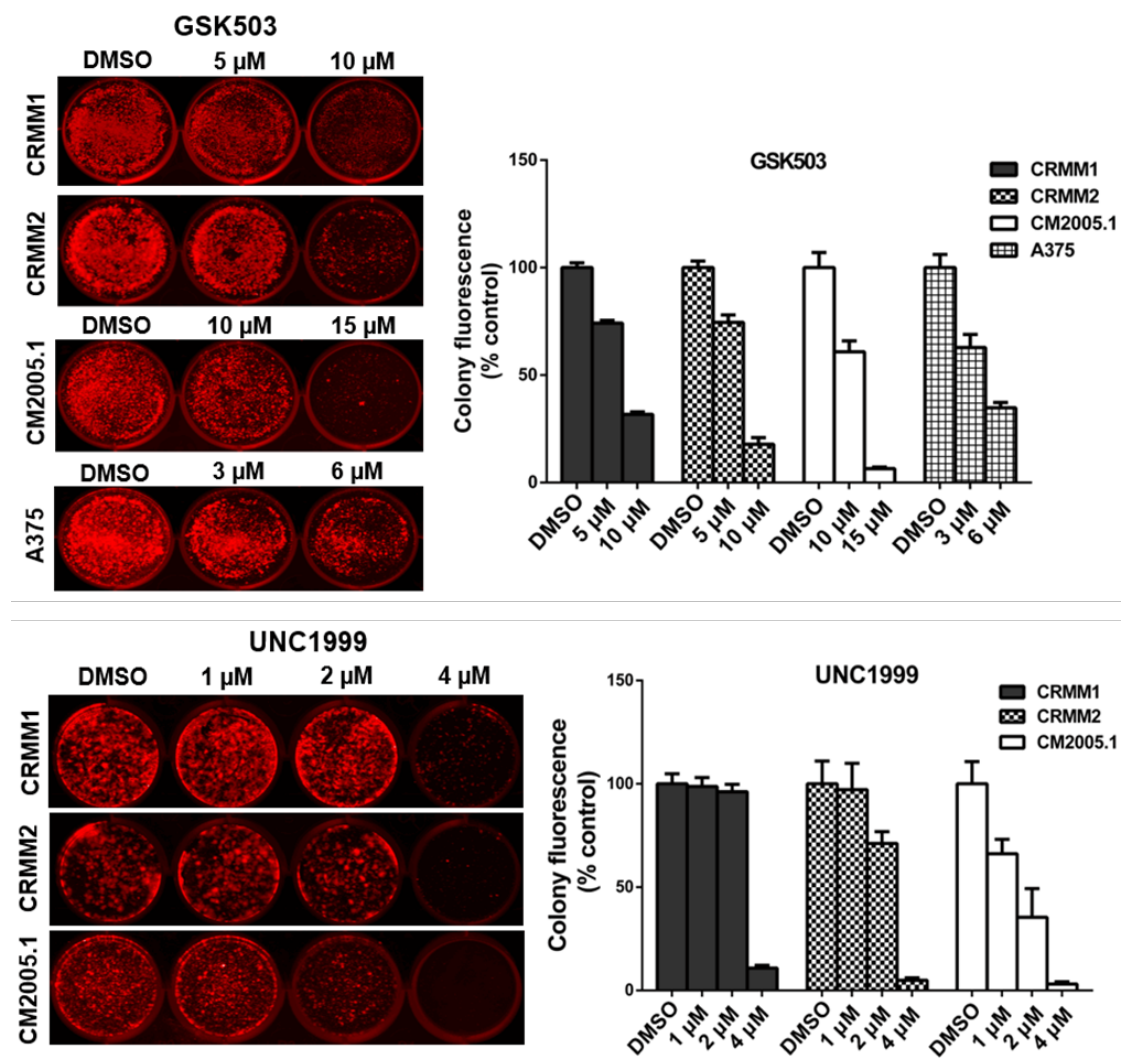

**Figure S1. GSK503 and UNC1999 inhibit colony formation in melanoma cell lines.**

Left: Representative images of cells exposed to drugs for 2 weeks. Right: Corresponding statistical analysis of colony formation. Data are presented as means  $\pm$  SEM, from one representative experiment.

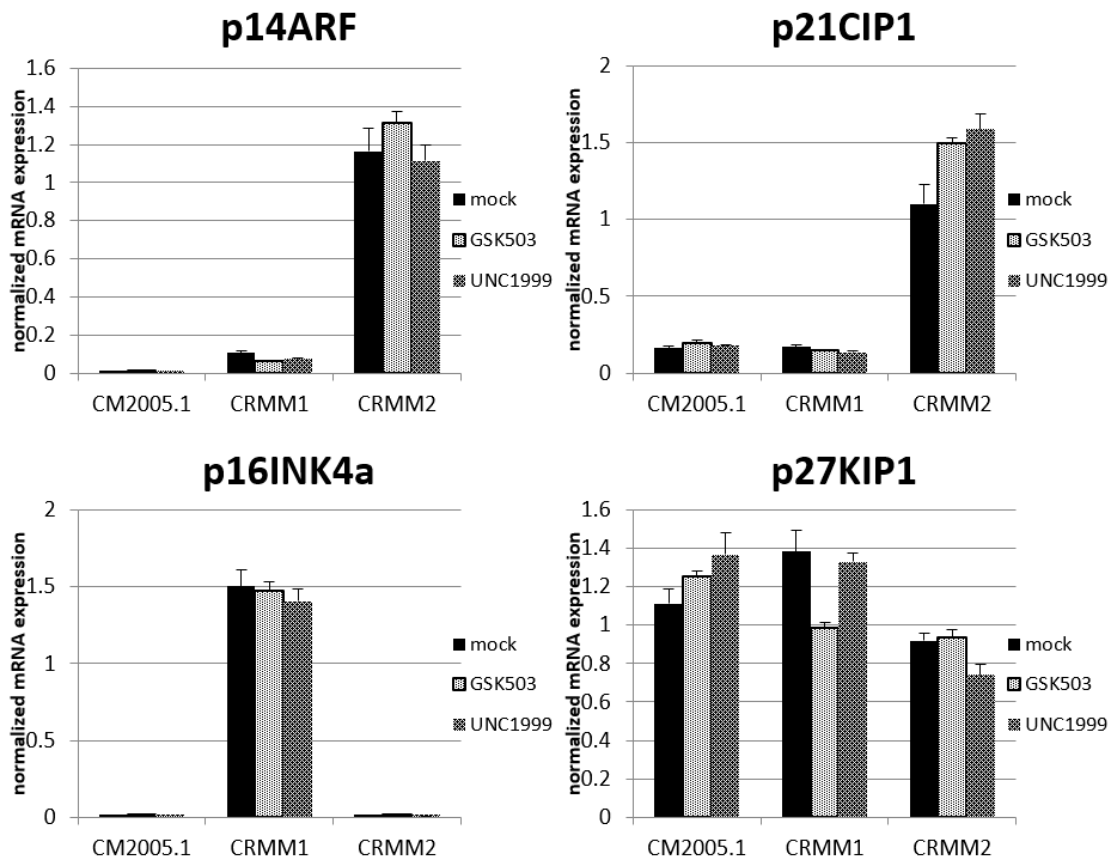

**Figure S2. GSK503 and UNC1999 do not alter the mRNA levels of *p14ARF*, *p16*, *p21* or *p27* in CM cell lines.** Three CM cell lines were treated with GSK503 or UNC1999, and the relative expression was obtained by normalizing to reference genes *CAPNS1* and *SRPR*.

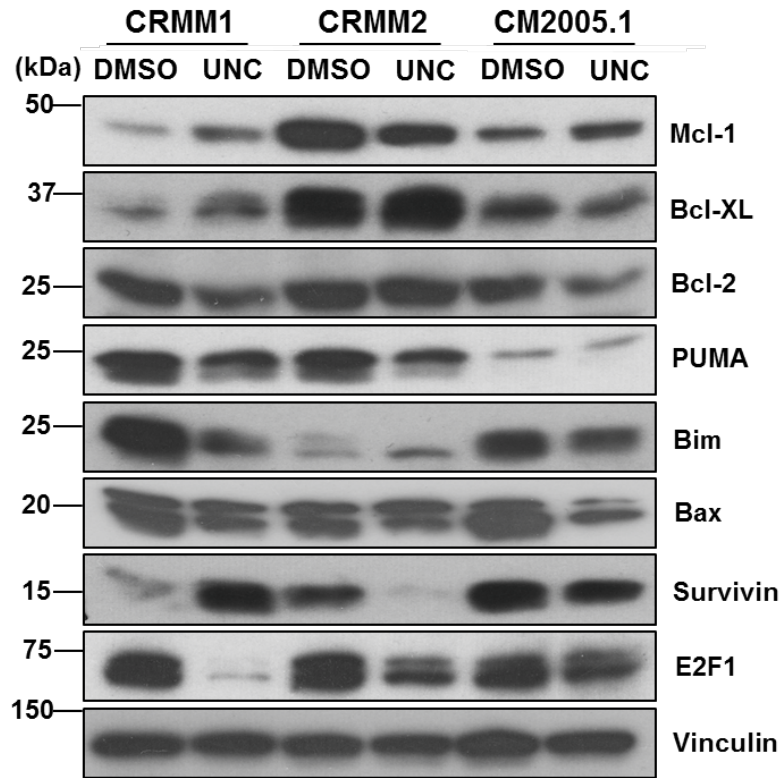

**Figure S3. Western blot analysis of several key apoptotic proteins after UNC1999 treatment.** CM cells were incubated with DMSO control or UNC1999 (6  $\mu$ M) for 120 h.

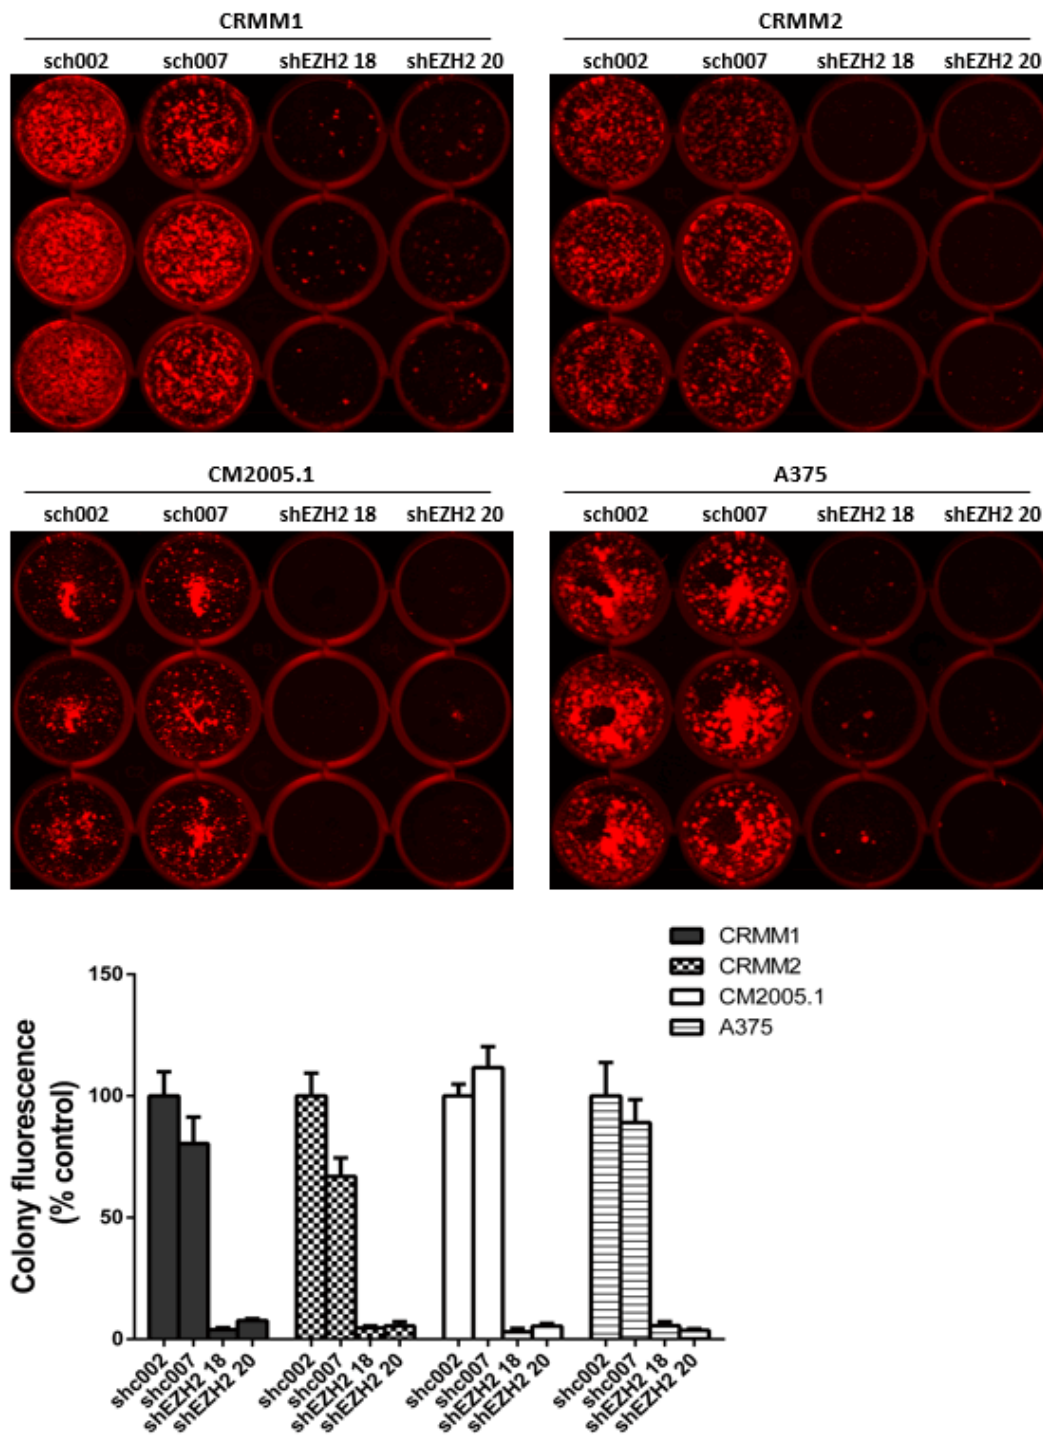

**Figure S4. EZH2 depletion inhibits colony-formation of three CM cell lines and A375.** Cells were seeded in triplicate in 12-well plates. After a 2-week incubation with siRNA, the plates were scanned. The fluorescence intensity (Y axis) was normalized to schc002 control cells in each experiment. Data are presented as means  $\pm$  SEM.

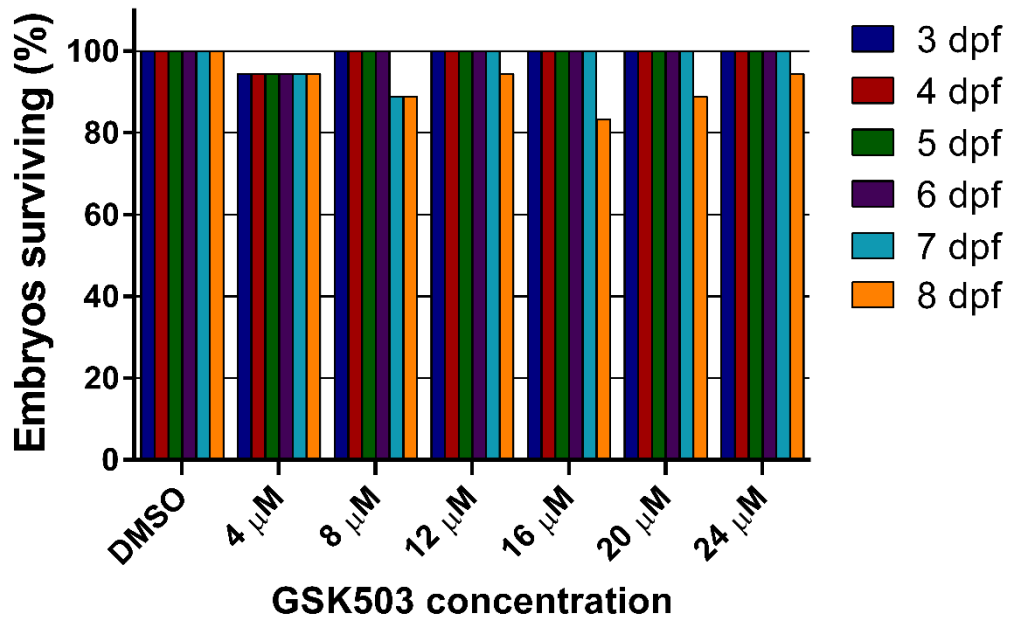

**Figure S5. Toxicity test of GSK503 in zebrafish.** Toxicity test performed in non-injected (fli: GFP) Casper zebrafish embryos from 3 dpf until 8 dpf, using different concentrations of GSK503. A concentration with a survival equal or higher than 80% was considered nontoxic to the embryos.
